# Supplementary material
Source: PubMed Central journal article supplement (PMC7832928)

### Supplementary material 1.

North of Italy regions. The red outlined areas represent the “red zones” for COVID-19 infection. The red dot represents the town of Medicina near Bologna.

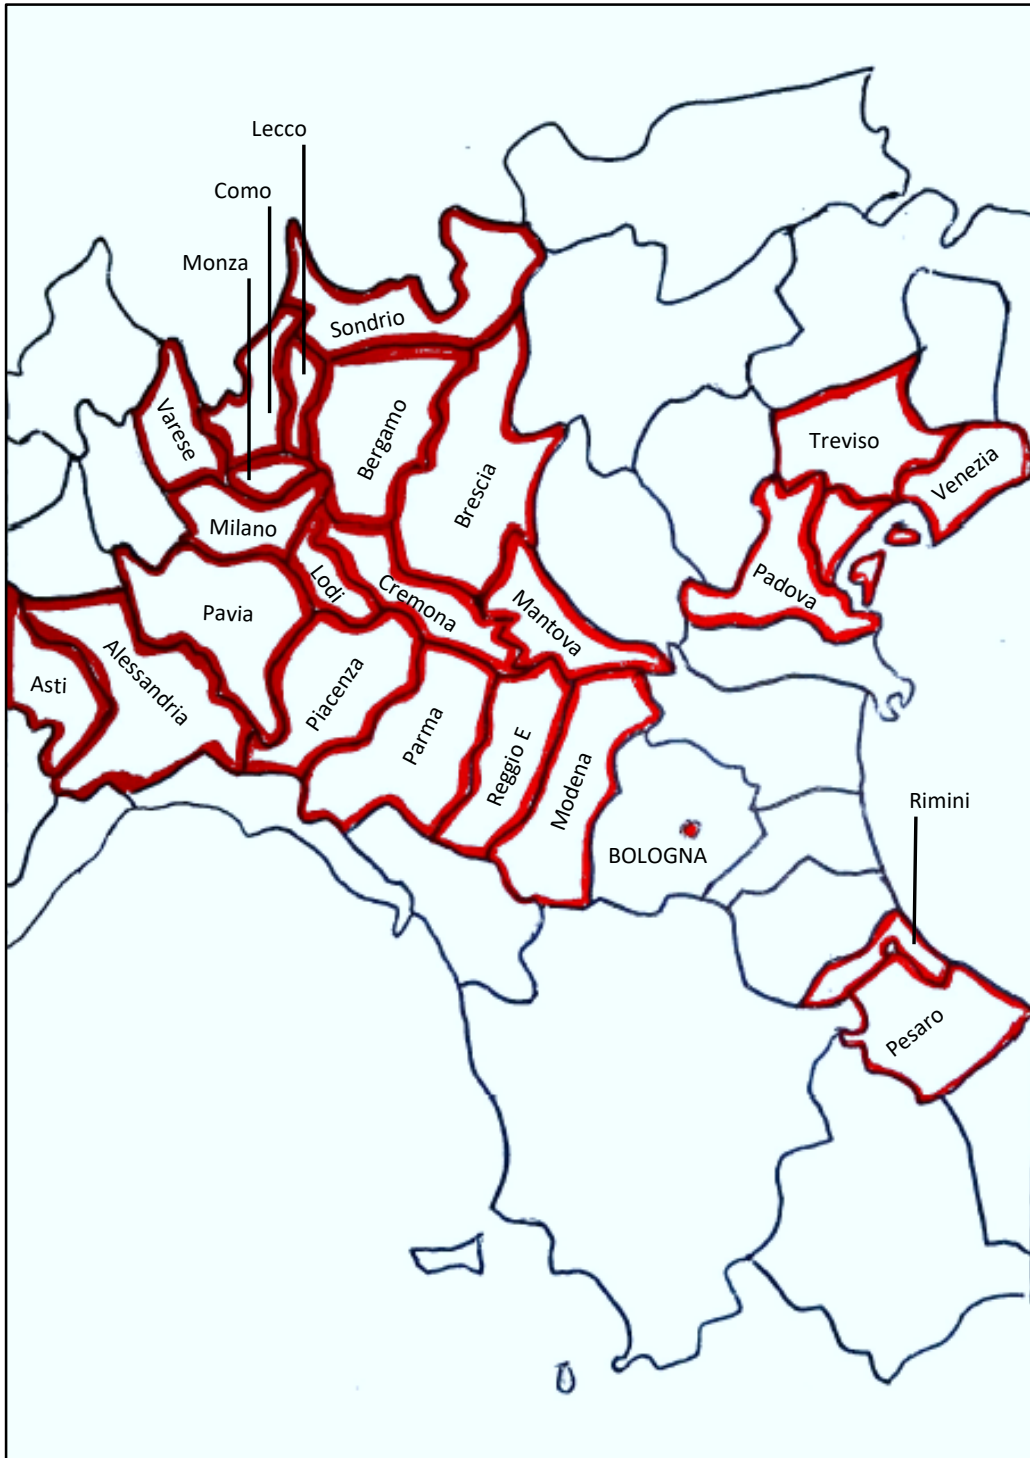

Supplement: mmc1.pdf [file mmc1.pdf]
